# Supplementary material
Source: HighWire-hosted journal article supplement (https://bmjopen.bmj.com/content/6/8/e010969)

Supplementary Figures

Supplementary Figure 1: Patient admissions and discharges with managing team within the one week benchmarking audit

**Patient Admissions and managing Acute Physician from Admission to Discharge**

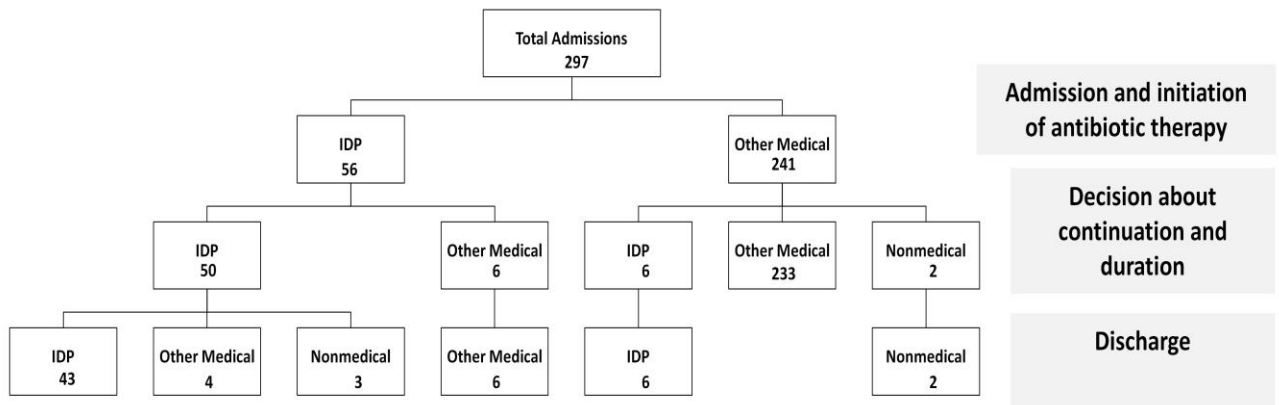

Supplementary Figure 2: Antibiotic use as total days of therapy(DOT), and as a percentage of total DOT used by IDP and Non-IDP groups

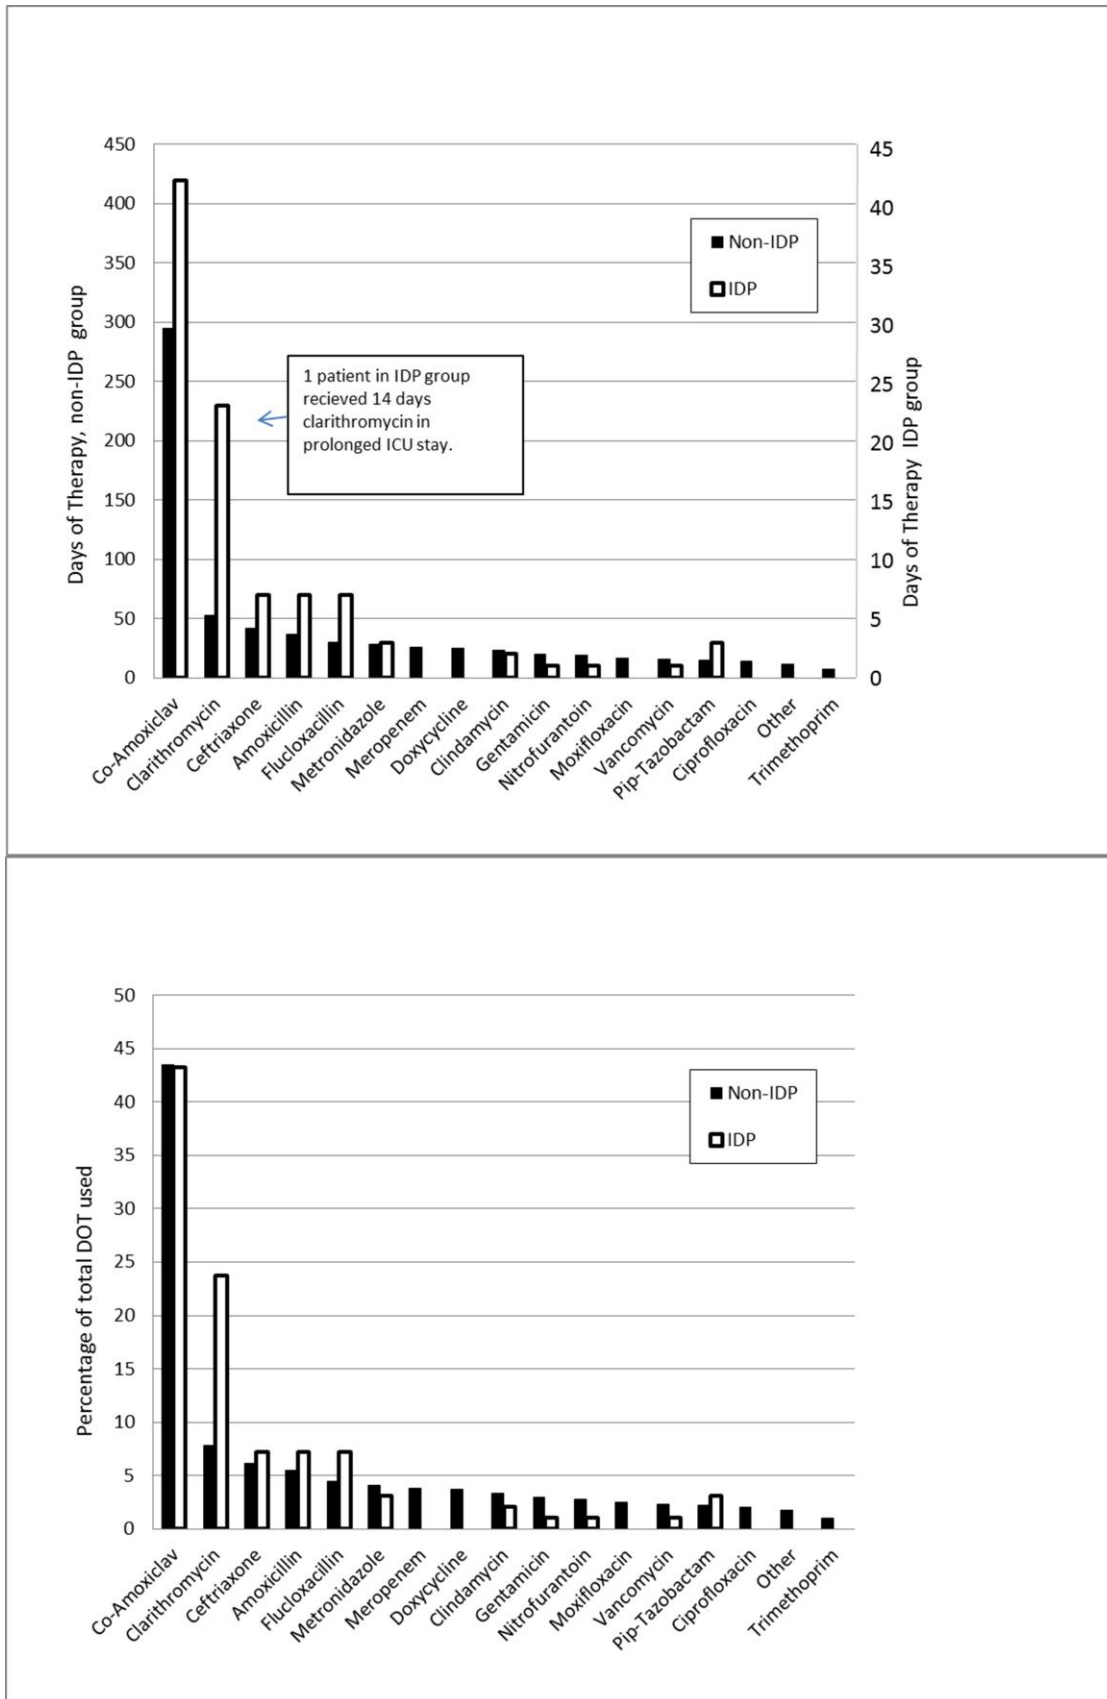

Supplement: inline-supplementary-material-1 [file inline-supplementary-material-1.pdf]
